# Supplementary material
Source: MDPI journal article supplement (https://www.mdpi.com/2073-4395/14/3/572)
Supplement: s1 [file s1]

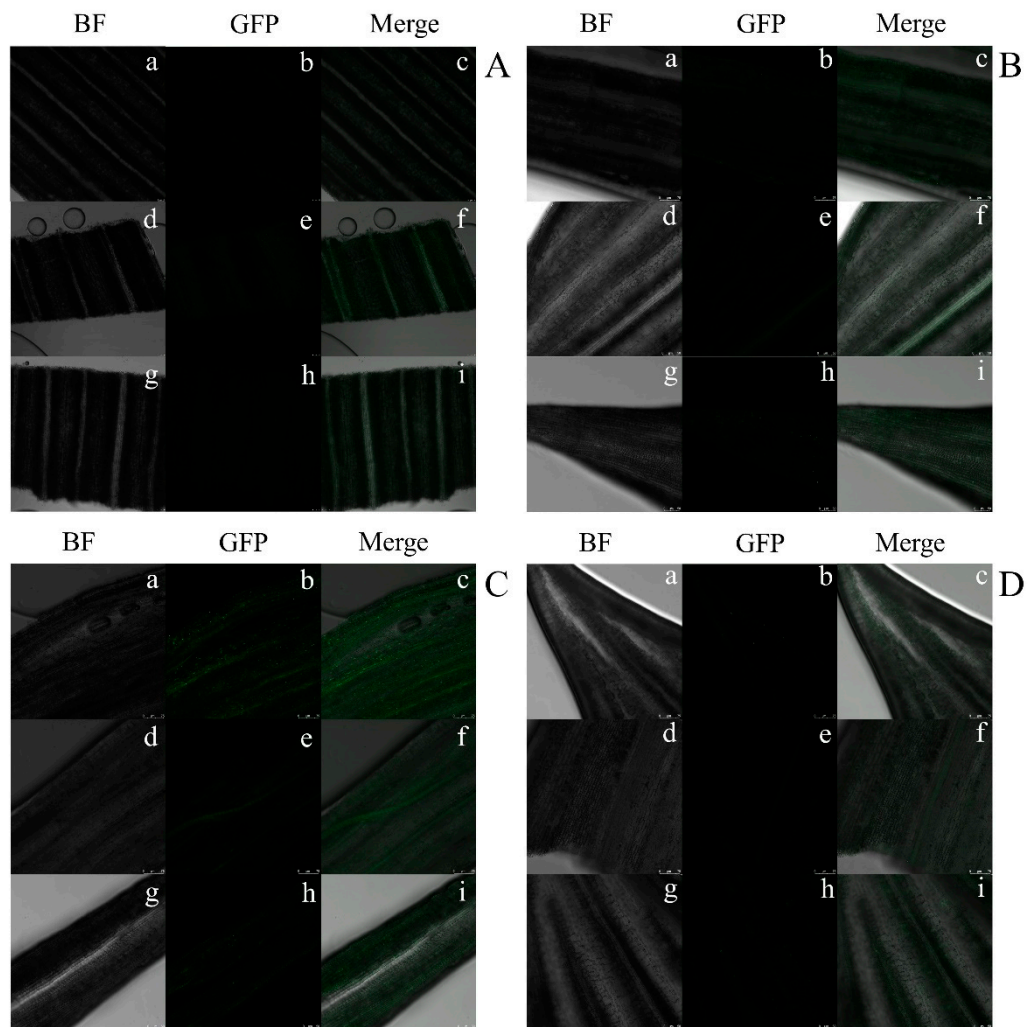

Figure S1. Laser confocal focusing on rice seedling leaves

(A) Under light.

(B) Under red light.

(C) Under red light and PAC.

(D) Under red light and GA.

(a, b, c: *OsCSN1DN32-GFP-OE*; d, e, f: *OsCSN1DN102-GFP-OE*; g, h i: *OsCSN1-GFP-OE*)



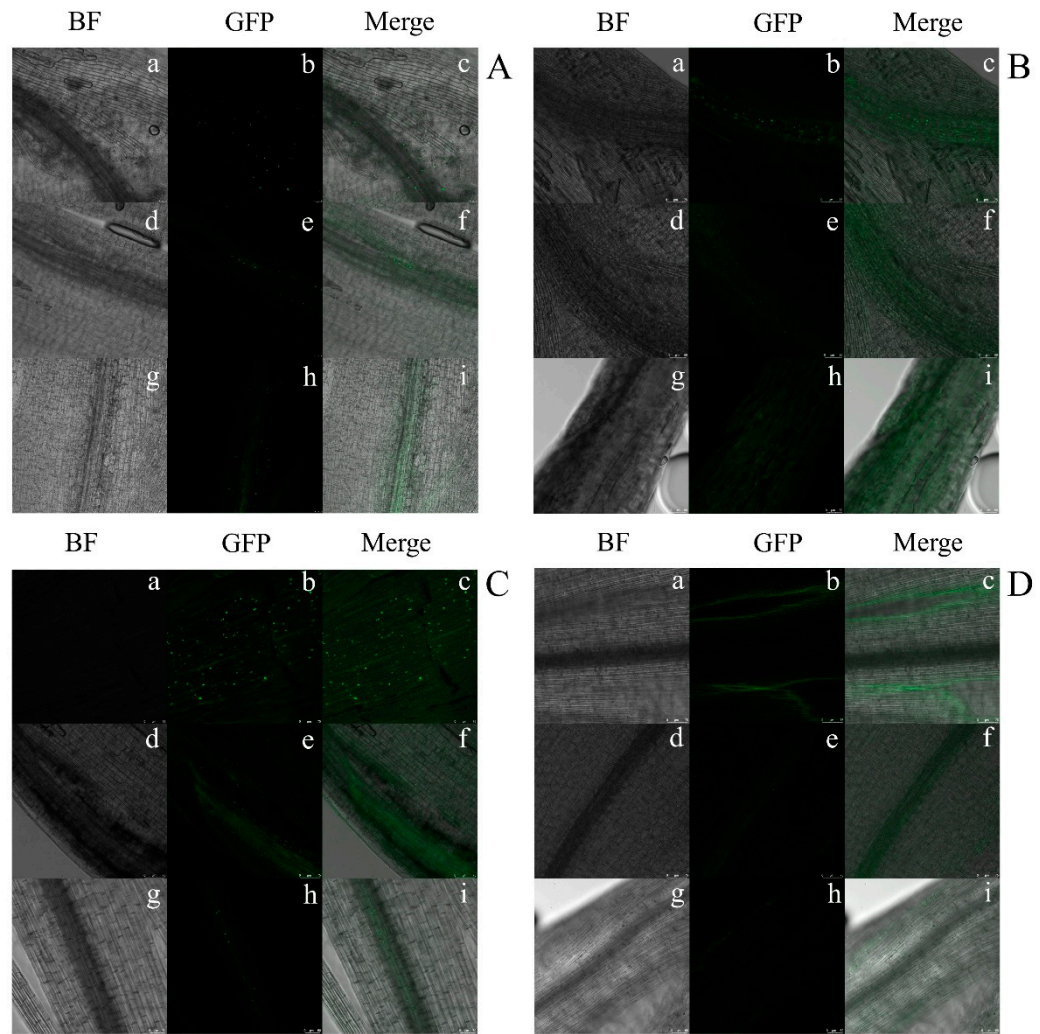

Figure S2. Laser confocal focusing on rice root

(A) Under light.

(B) Under red light.

(C) Under red light and PAC.

(D) Under red light and GA.

(a, b, c: *OsCSN1DN32-GFP-OE*; d, e, f: *OsCSN1DN102-GFP-OE*; g, h i: *OsCSN1-GFP-OE*)



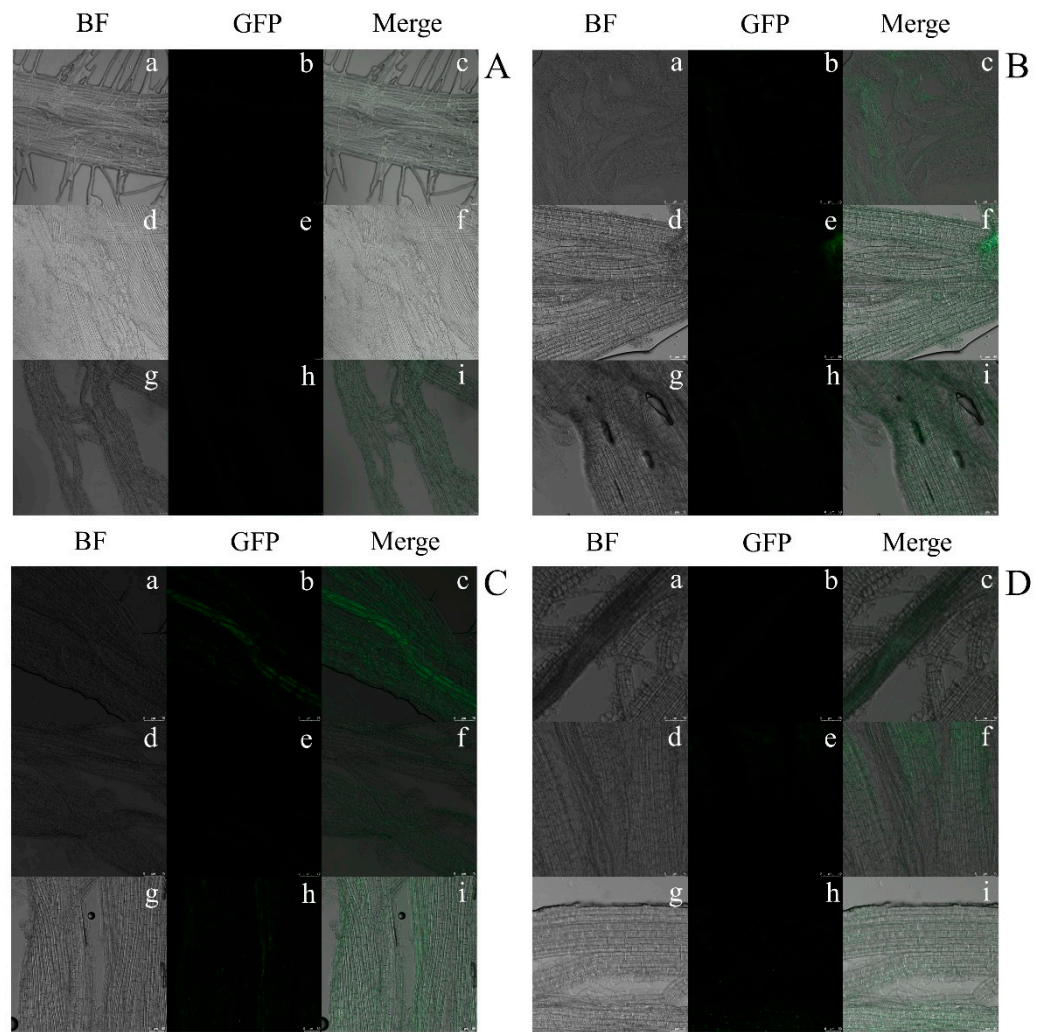

Figure S3. Laser confocal focusing on rice coleoptile

(A)—Under light.

(B)—Under red light.

(C)—Under red light and PAC.

(D)—Under red light and GA.

(a, b, c: *OsCSN1DN32-GFP-OE*; d, e, f: *OsCSN1DN102-GFP-OE*; g, h i: *OsCSN1-GFP-OE*)
